# Supplementary material for: Morphology-oxygen evolution activity relationship of iridium(iv) oxide nanomaterials
Source: Royal Society of Chemistry journal article supplement (doi:10.1039/d1nj05133d), 2022-01-01
Supplement: d1nj05133d1.pdf [file d1nj05133d1.pdf]

## Electronic Supporting Information

### Morphology-Oxygen Evolution Activity Relationship of Iridium(IV) Oxide Nanomaterials

Swati Mohan<sup>1</sup>, Santosh K. Gupta<sup>2,3</sup>, and Yuanbing Mao<sup>4,\*</sup>

<sup>1</sup>Department of Chemistry, University of Texas Rio Grande Valley, 1201 West University Drive, Edinburg, Texas 78539, USA

<sup>2</sup>Radiochemistry Division, Bhabha Atomic Research Centre, Trombay, Mumbai-400085, India

<sup>3</sup>Homi Bhabha National Institute, Anushaktinagar, Mumbai – 400094, India

<sup>4</sup>Department of Chemistry, Illinois Institute of Technology, 3105 South Dearborn Street, Chicago, IL 60616, USA

\*To whom correspondence should be addressed. E-mail: ymao17@iit.edu, Tel.: +1-312-567-3815

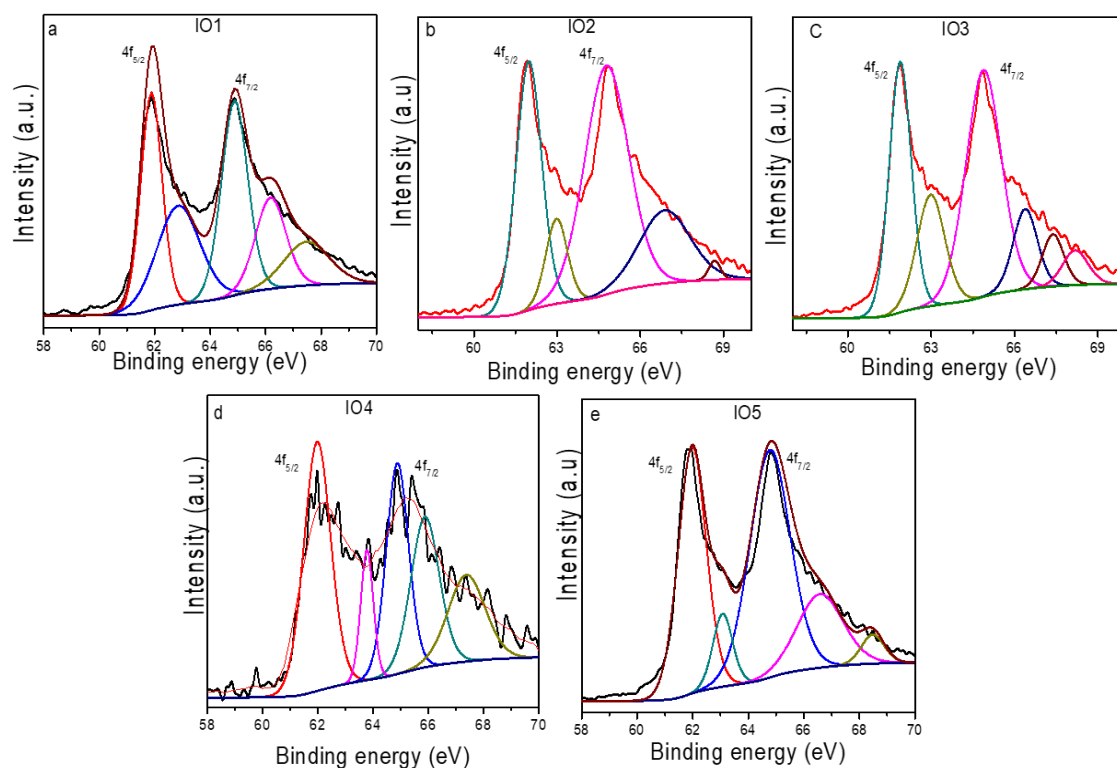

**Figure S1.** XPS spectra of Ir 4f core level electrons of the five NIO samples.

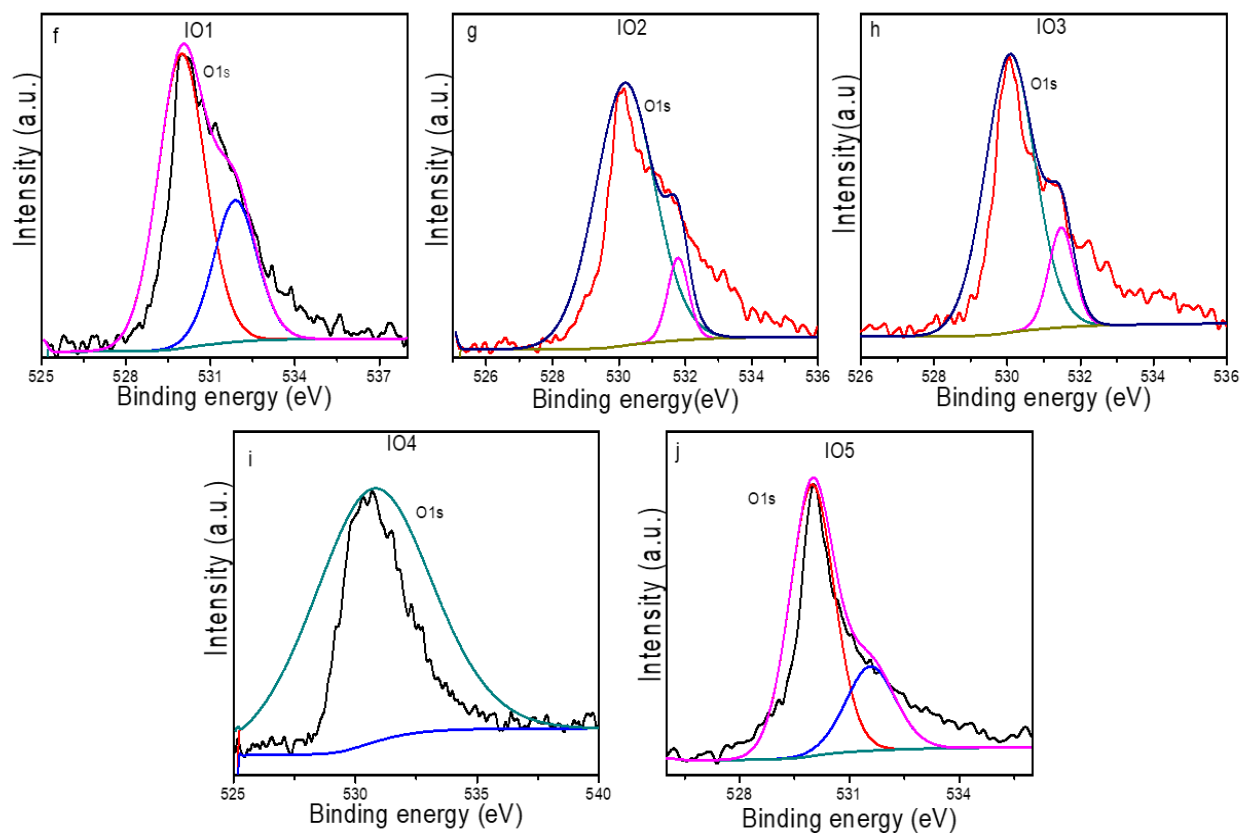

**Figure S2.** XPS spectra of O1s core level electrons of the five NIO samples.

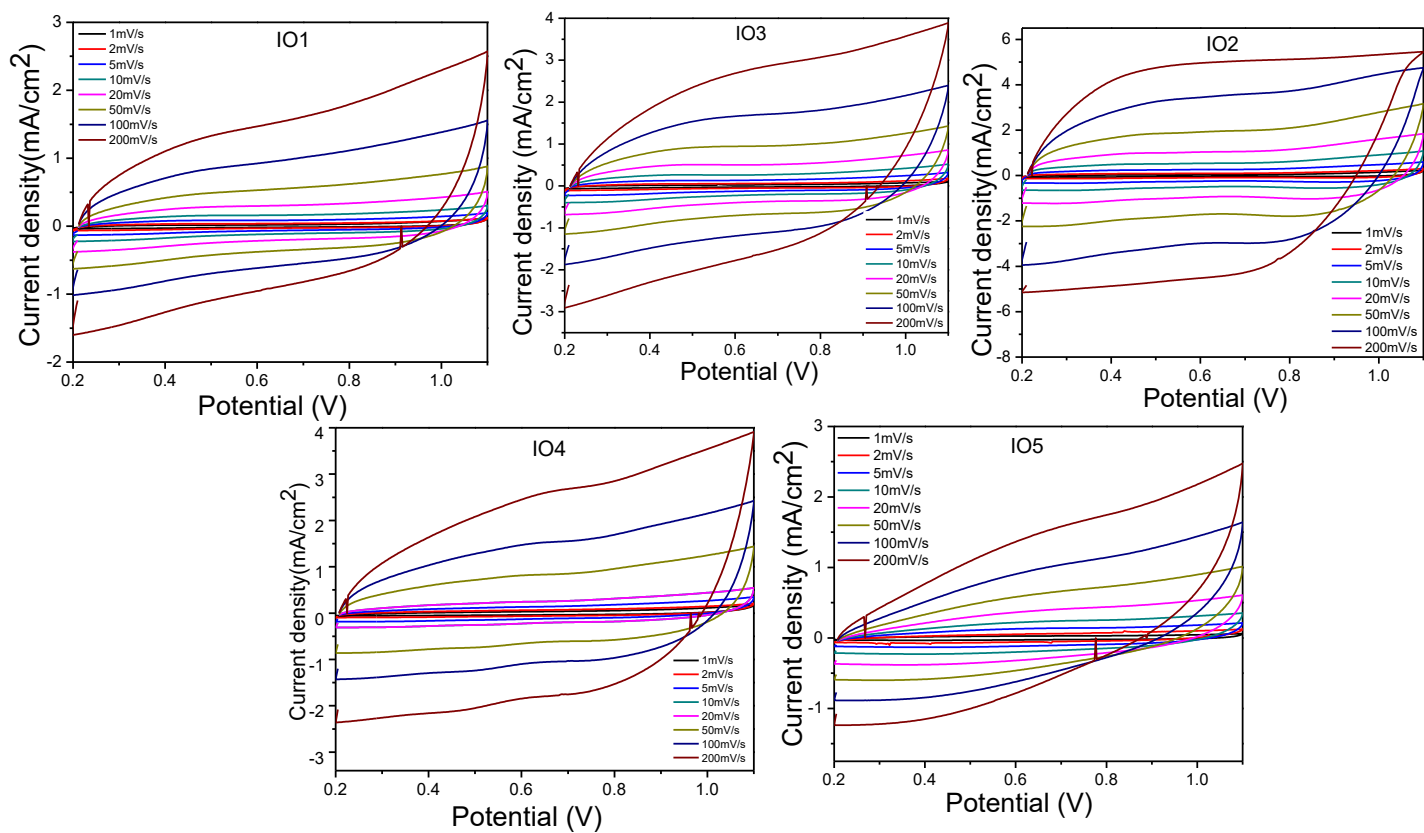

**Figure S3.** CV curves of the five NIO samples at different scan rates of 1, 2, 5, 10, 20, 50, 100 and 200 mV/sec.

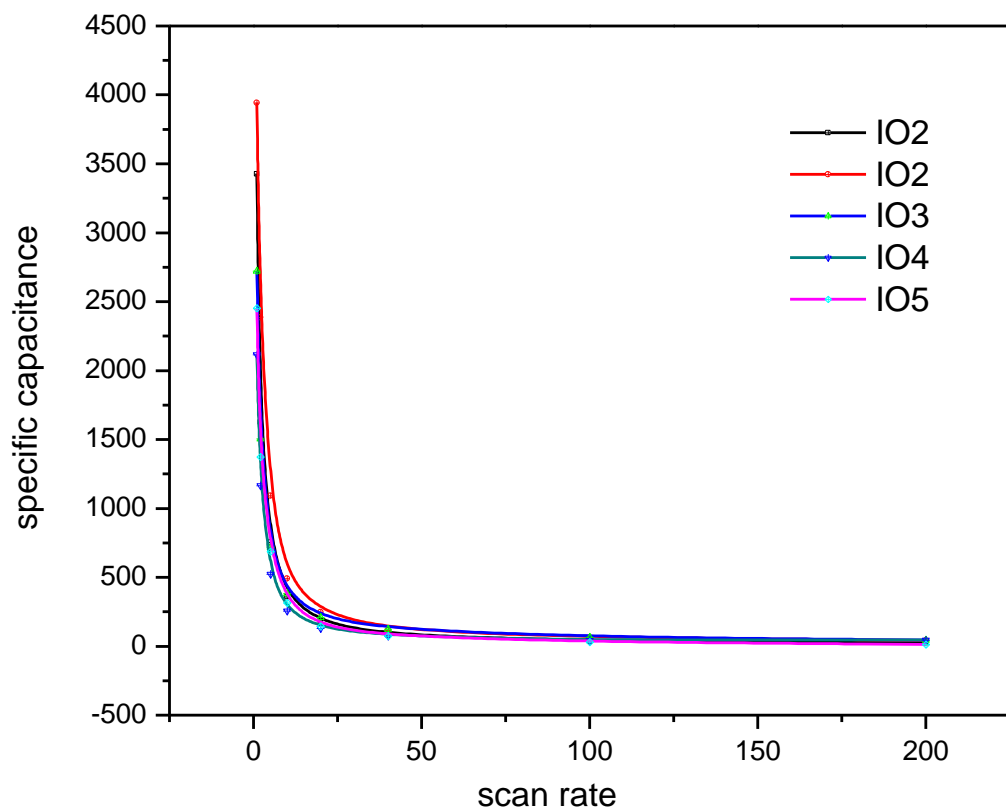

**Figure S4.** Specific capacitance vs. scan rate of the five NIO samples.

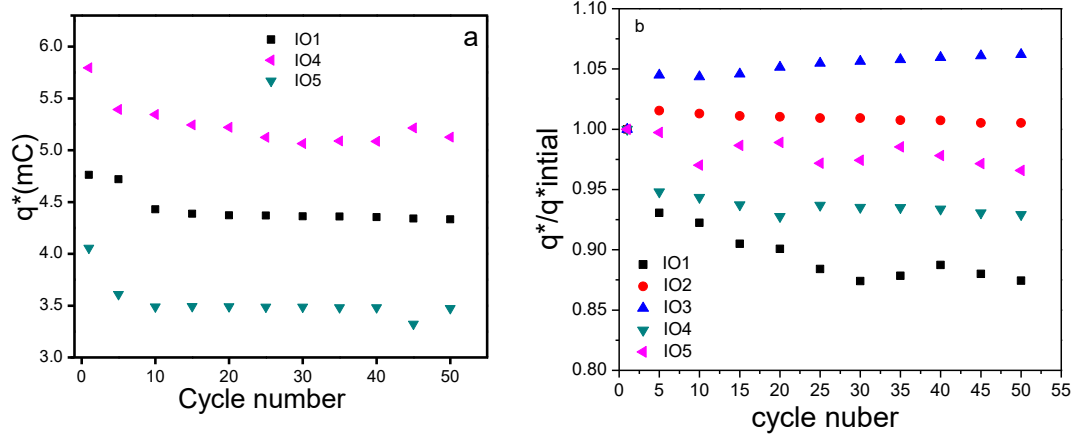

**Figure S5.** (a) Magnified variation of the measured charge ( $q^*$ ) with cycling number from three of the five NIO samples during stability measurements. (b)  $q^*/q_{initial}^*$  ratio evolution from the five NIO samples during stability measurements.

**Table S1.** Voltammetric charges for all five NIO electrocatalyst samples

| Scan rate (mV/sec) | $q^*$ (C) |          |          |          |          |
|--------------------|-----------|----------|----------|----------|----------|
|                    | IO1       | IO2      | IO3      | IO4      | IO5      |
| 200                | 7.93E-03  | 7.82E-03 | 4.68E-03 | 2.48E-03 | 8.10E-03 |
| 100                | 3.85E-03  | 5.68E-03 | 3.31E-03 | 2.79E-03 | 6.02E-03 |
| 40                 | 2.69E-03  | 4.12E-03 | 2.92E-03 | 2.67E-03 | 4.50E-03 |
| 20                 | 2.34E-03  | 4.47E-03 | 3.08E-03 | 2.63E-03 | 3.76E-03 |
| 10                 | 2.31E-03  | 4.43E-03 | 3.23E-03 | 2.85E-03 | 3.43E-03 |
| 5                  | 2.36E-03  | 4.91E-03 | 3.40E-03 | 3.10E-03 | 3.24E-03 |
| 2                  | 2.62E-03  | 5.37E-03 | 3.66E-03 | 3.09E-03 | 3.39E-03 |
| 1                  | 2.38E-03  | 4.43E-03 | 3.85E-03 | 2.76E-03 | 3.06E-03 |

**Table S2.** OER electrochemical performance from literature reports compared with the IO3 sample synthesized by the MSS method

| References                            | Electrochemical performance of IrO <sub>2</sub>                                                                                                                                                  |
|---------------------------------------|--------------------------------------------------------------------------------------------------------------------------------------------------------------------------------------------------|
| J. Phys. Chem. C, 2016, 120, 2562     | OER onset potential of ~1.5 V and current density of 10 mA/cm <sup>2</sup>                                                                                                                       |
| Electrochim. Acta, 2016, 212, 686     | IrO <sub>2</sub> nanorods generated higher OER current density of 70 mA/cm <sup>2</sup> whereas commercial sample demonstrated current density of 58 mA/cm <sup>2</sup>                          |
| J. Phys. Chem. Lett., 2014, 5, 1636   | IrO <sub>2</sub> (100) facets showed 5 times higher current density than IrO <sub>2</sub> (001) at an overpotential of 0.3 V with 3 μA/cm <sup>2</sup> and 0.5 μA/cm <sup>2</sup> , respectively |
| J. Phys. Chem. Lett., 2012, 3, 399    | IrO <sub>2</sub> nanoparticles demonstrated current density of 4 μA/cm <sup>2</sup> in acid and 2 μA/cm <sup>2</sup> in alkaline medium                                                          |
| J. Mater. Chem., 2012, 22, 6010       | OER onset potential of ~1.6 V and current density of 25 mA/cm <sup>2</sup>                                                                                                                       |
| Nanoparticle Research, 2011, 13, 1639 | OER onset potential of ~1.8 V and current density of 1.32 A/cm <sup>2</sup>                                                                                                                      |
| This work                             | OER onset potential of ~0.65 V and current density of ~84.1 mA/cm <sup>2</sup>                                                                                                                   |
